# Supplementary material for: Ciprofloxacin reduces tenocyte viability and proteoglycan synthesis in short-term explant cultures of equine tendon
Source: PeerJ. 2021 Aug 30;9:e12003. doi: 10.7717/peerj.12003 (PMC8411937; doi:10.7717/peerj.12003)
Supplement: Supplemental Information 1 — Raw values and descriptive statistics for cell viability, GAG concentration 35 s incorporation, and mRNA expression of decorin, fibromodulin, biglycan, aggrecan & versican after 96 h treatment with 1, 10, 100, or 300 ug/mL ciprofloxacin. Values after an 8 day recovery period also included for all analyses except GAG analysis. [file peerj-09-12003-s001.xlsx]

## Sheet: Tenocyte Viability Presto (96h)
	Sample		raw abdorbance (triplicate)			mean absorbance	Count/mg (-blank)	% of control					Tissue Weights
													Treatment	Tissue Wet Weight (mg)
	blank		1773335	1718174	1705358	1732289								n1	n2	n3	n4
	n1 0		7149412	7202607	7246898	7199639	68341.9	100					Control	80	83	94	101
	n1 1		10068336	10126077	10186621	1.0127e+07	57498.1	84.133					1	146	141	119	113
	n1 10		5382256	5608365	5660599	5.55041e+06	45453.8	66.5094					10	84	85	99	120
	n1 100		6148495	6183883	6280201	6204193	45631.7	66.7697					100	98	97	139	145
	n1 300		7427986	7357089	7356948	7.38067e+06	55924.6	81.8307					300	101	135	129	100
	n2 0		6969609	7143285	7046000	7.05296e+06	64104.5	100
	n2 1		6367035	6429962	6540400	6445799	33429.1	52.1479
	n2 10		6620230	6893166	7026245	6846547	60167.7	93.8588
	n2 100		6073254	6079536	6102765	6085185	44875.2	70.0032
	n2 300		6588572	6710926	6650070	6649856	36426.4	56.8235
	blank		789796	787681	813753	797077
	n2 0		7002272	7222956	7153902	7.12638e+06	67333	100
	n2 1		7588719	7417890	7623239	7.54328e+06	56690.8	84.1947
	n2 10		7601259	7286286	7394061	7427202	66971	99.4623
	n2 100		8266523	7925646	8018745	8.0703e+06	52325.4	77.7114
	n2 300		6913544	6827890	6880709	6.87405e+06	47108.3	69.9632
	n2 0		8051229	8286176	8271939	8.20311e+06	73327.1	100
	n2 1		7423820	7486036	7587805	7.49922e+06	59311	80.8855
	n2 10		7817049	7921766	8086695	7.94184e+06	59539.7	81.1973
	n2 100		7052515	7075534	7018403	7.04882e+06	43115.5	58.7988
	n2 300		5512781	5492012	5523749	5509514	47124.4	64.266
			raw abdorbance		mean	Count/mg (-blank)	% of control
Sample					N1
blank		1773335	1718174	1705358	1732289
n1 0		7149412	7202607	7246898	7199639	68341.9	100
n1 1		10068336	10126077	10186621	1.0127e+07	57498.1	84.133
n1 10		5382256	5608365	5660599	5.55041e+06	45453.8	66.5094
n1 100		6148495	6183883	6280201	6204193	45631.7	66.7697
n1 300		7427986	7357089	7356948	7.38067e+06	55924.6	81.8307
					N2
n2 0		6969609	7143285	7046000	7.05296e+06	64104.5	100
n2 1		6367035	6429962	6540400	6445799	33429.1	52.1479
n2 10		6620230	6893166	7026245	6846547	60167.7	93.8588
n2 100		6073254	6079536	6102765	6085185	44875.2	70.0032
n2 300		6588572	6710926	6650070	6649856	36426.4	56.8235
					N3
n2 0		789796	787681	813753	797077
n2 1		7002272	7222956	7153902	7.12638e+06	67333	100
n2 10		7588719	7417890	7623239	7.54328e+06	56690.8	84.1947
n2 100		7601259	7286286	7394061	7427202	66971	99.4623
n2 300		8266523	7925646	8018745	8.0703e+06	52325.4	77.7114
		6913544	6827890	6880709	6.87405e+06	47108.3	69.9632
n2 0		8051229	8286176	8271939	8.20311e+06	73327.1	100
n2 1		7423820	7486036	7587805	7.49922e+06	59311	80.8855
n2 10		7817049	7921766	8086695	7.94184e+06	59539.7	81.1973
n2 100		7052515	7075534	7018403	7.04882e+06	43115.5	58.7988
n2 300		5512781	5492012	5523749	5509514	47124.4	64.266

## Sheet: Tenocyte Viability Recovery
	Sample		raw abdorbance (triplicate)			mean absorbance	Count/mg tissue (-blank)	% of control					Tissue Weights
													Treatment	Wet Weight (mg)
	blank		1379264	1373121	1369875	1.37409e+06								n1	n2	n3	n4
	n1 0		25167466	18108230	17429006	2.02349e+07	117880	100					Control	160	180	182	195
	n1 1		15418220	14588480	14604576	1.48704e+07	85963.9	72.9249					1	157	185	251	231
	n1 10		17002716	17207710	17303050	1.71712e+07	94030.2	79.7677					10	168	201	229	260
	n1 100		13485493	13528166	13605593	1.35398e+07	64029.8	54.3177					100	190	164	183	232
	n1 300		12589036	12580089	12512634	1.25606e+07	72171	61.2241					300	155	227	225	190
	n2 0		20637344	18802764	18645638	1.93619e+07	99932.4	100
	n2 1		14252546	14169419	14516032	1.43127e+07	69938.3	69.9856
	n2 10		16646042	16543312	16684544	1.66246e+07	75873.4	75.9247
	n2 100		13787718	13870740	13975018	1.38778e+07	76242.3	76.2939
	n2 300		10987303	10982688	11022204	1.09974e+07	42393.4	42.4221
	blank		1350850	1374862	1368372	1.36469e+06
	n2 0		18598882	17176836	16477513	1.74177e+07	88203.6	100
	n2 1		14007316	13950457	14104533	1.40208e+07	50422.6	57.1662
	n2 10		14796625	14620469	14600611	1.46726e+07	58113	65.8851
	n2 100		11698628	11565761	11537807	11600732	55934.6	63.4154
	n2 300		11377684	11192979	11113124	11227929	43836.6	49.6993
	n2 0		16750861	16235481	16114231	1.63669e+07	76934.2	100
	n2 1		16106725	16072372	15975682	16051593	63579.6	82.6416
	n2 10		14947706	14804320	14713761	14821929	51758.6	67.2765
	n2 100		15167546	15232552	15000292	1.51335e+07	59348.1	77.1415
	n2 300		11157208	11358242	11376802	1.12974e+07	52277.5	67.9509

## Sheet: GAG assay
																			Tissue Weights
Standard n1						Samples n1													Treatment	Tissue Dry Weight (mg)
Chondrotian Sulphate Conc. (ug/mL)	raw abs.		mean abs.	mean abs - blank			raw abs.		mean abs - blank	GAG conc. (ug/mL)	GAG conc. Per mg dry weight	% of control								n1	n2	n3
50	0.2804	0.2793	0.27985	0.1288		n1 0	0.1811	0.1868	0.0329	4.56	0.217143	100							Control	21	17	23
25	0.2607	0.2593	0.26	0.10895		n1 1	0.1955	0.1923	0.04285	8.54	0.328462	151.265							1	26	29	20
12.5	0.2124	0.21	0.2112	0.06015		n1 10	0.1984	0.2054	0.05085	11.74	0.404828	186.434							10	29	20	20
5	0.185	0.1902	0.1876	0.03655		n1 100	0.2135	0.2134	0.0624	16.36	0.51125	235.444							100	32	23	28
0	0.15	0.1521	0.15105	0		n1 300	0.1904	0.1918	0.04005	7.42	0.265	122.039							300	28	31	28
Standard n2 & 3						Samples n2 & 3
Chondrotian Sulphate Conc. (ug/mL)	raw abs.		mean abs.	mean abs - blank			raw abs.		mean abs - blank	GAG conc. (ug/mL)	GAG conc. Per mg dry weight	% of control
0	0.0848	0.0846	0.0847	0		n2 0	0.1253	0.1189	0.0374	26.9091	1.58289	100
12.5	0.1057	0.1041	0.1049	0.0202		n2 1	0.1225	0.122	0.03755	27.0455	0.932602	58.9178
25	0.1231	0.1227	0.1229	0.0382		n2 10	0.1198	0.1355	0.04295	31.9545	1.59773	100.938
50	0.1574	0.1558	0.1566	0.0719		n2 100	0.1266	0.1337	0.04545	34.2273	1.48814	94.0144
75	0.1873	0.1854	0.18635	0.10165		n2 300	0.1304	0.1351	0.04805	36.5909	1.18035	74.5695
100	0.2028	0.2039	0.20335	0.11865
125	0.2301	0.2244	0.22725	0.14255
						n3 0	0.1247	0.1243	0.0398	15	0.652174	100
						n3 1	0.1277	0.1256	0.04195	16.5357	0.826786	126.774
						n3 10	0.1243	0.172	0.06345	31.8929	1.59464	244.512
						n3 100	0.1241	0.1286	0.04165	16.3214	0.582908	89.3793
						n3 300	0.1298	0.1318	0.0461	19.5	0.696429	106.786

## Sheet: 35s incorporation (96h) 
Tissue Extract Scintillation Count (counts per minute)
n1											Tissue Weights
Cipro Tx	GnHCl	NaOH	TOTAL	corrected (100mg/wet)	% of control						Treatment	Wet Weight (mg)
0 (control)	1907	1151	3058	209.094	100							n1	n2	n3	n4	n5	n6
1	3314	1124	4438	308.73	147.651						Control	117	115	83	110	108	86
10	2062	761	2823	250.933	120.01						1	115	120	130	93	92	72
100	1699	681	2380	202.553	96.8718						10	90	115	112	101	118	102
300	1484	882	2366	146.729	70.1735						100	94	124	98	95	119	89
											300	129	133	122	105	117	102
n2
Cipro Tx	GnHCl	NaOH	TOTAL	corrected (100mg/wet)	% of control
0 (control)	2119	1346	3465	241.043	100
1	3207	1477	4684	312.267	129.548
10	3274	1157	4431	308.243	127.879
100	1367	898	2265	146.129	60.6235
300	1074	867	1941	116.752	48.436
n3
Cipro Tx	GnHCl	NaOH	TOTAL	corrected (100mg/wet)	% of control
0 (control)	8706	2754	11460	1104.58	100
1	11187	2688	13875	853.846	77.3006
10	10930	2688	13618	972.714	88.062
100	3575	1750	5325	434.694	39.3538
300	6303	2159	8462	554.885	50.235
n4
Cipro Tx	GnHCl	NaOH	TOTAL	corrected (100mg/wet)	% of control
0 (control)	12943	3965	16908	1229.67	100
1	9843	3013	12856	1105.89	89.9339
10	9061	2766	11827	936.792	76.1822
100	3397	1614	5011	421.979	34.3164
300	5769	2501	8270	630.095	51.2409
n5
Cipro Tx	GnHCl	NaOH	TOTAL	corrected (100mg/wet)	% of control
0 (control)	16805	8123	24928	230.815	100
1	15435	8814	24249	263.576	114.194
10	6943	4666	11609	98.3814	42.6235
100	10681	4280	14961	125.723	54.4691
300	15194	4883	20077	171.598	74.3446
n6
Cipro Tx	GnHCl	NaOH	TOTAL	corrected (100mg/wet)	% of control
0 (control)	16663	8065	24728	287.535	100
1	15458	6536	21994	305.472	106.238
10	10819	4789	15608	153.02	53.2178
100	8551	4978	13529	152.011	52.8671
300	9641	6476	16117	158.01	54.9533

## Sheet: 35s incorporation (recovery)
Tissue Extract Scintillation Count (counts per minute)
n1											Tissue Weights
Cipro Tx	GnHCl	NaOH	TOTAL	corrected (100mg/wet)	% of control						Treatment	Wet Weight (mg)
0 (control)	8048	2560	10608	893.305	100							n1	n2	n3	n4
1	9127	2804	11931	859.892	96.2596						Control	95	121	99	100
10	11564	3119	14683	1163.01	130.192						1	111	117	97	91
100	10175	2881	13056	828.952	92.7961						10	101	88	92	84
300	10804	2610	13414	984.514	110.21						100	126	97	101	98
											300	109	119	106	102
n2
Cipro Tx	GnHCl	NaOH	TOTAL	corrected (100mg/wet)	% of control
0 (control)	10361	2946	13307	879.802	100
1	9662	2883	12545	857.778	97.4967
10	9874	3189	13063	1187.55	134.979
100	10298	2464	12762	1052.54	119.633
300	5488	2476	7964	535.395	60.8541
n3
Cipro Tx	GnHCl	NaOH	TOTAL	corrected (100mg/wet)	% of control
0 (control)	12087	3841	15928	1287.11	100
1	12970	4201	17171	1416.16	110.027
10	16719	6341	23060	2005.22	155.792
100	13892	4308	18200	1441.58	112.002
300	12660	3704	16364	1235.02	95.9528
n4
Cipro Tx	GnHCl	NaOH	TOTAL	corrected (100mg/wet)	% of control
0 (control)	9812	2572	12384	990.72	100
1	9155	2317	11472	1008.53	101.797
10	11451	2999	14450	1376.19	138.908
100	12905	3373	16278	1328.82	134.126
300	6480	2489	8969	703.451	71.004

## Sheet: Decorin PCR
n1											Summary
GOI	CPX conc.	Ct	mean Ct		HK Gene	CPX conc.	Ct	mean Ct			Gene of Interest (GOI)	Sample	Ct (GOI)	Ct GAPDH (REF)	∆Ct	∆∆Ct	fold
DEC	0	29.2189			GAPDH	0	22.8303				n1 DEO	Control (0)	29.2329	22.8923	6.34057	0	1
DEC	0	29.2029			GAPDH	0	22.8716				n1 DEO	1um Cipro	28.3964	23.0167	5.37977	-0.960798	1.94639
DEC	0	29.2768	29.2329		GAPDH	0	22.975	22.8923			n1 DEO	10um Cipro	28.3799	22.7589	5.62097	-0.7196	1.64673
DEC	1	28.4427			GAPDH	1	22.9778				n1 DEO	100um Cipro	29.4343	23.3758	6.05843	-0.282132	1.21599
DEC	1	28.3574			GAPDH	1	23.0265				n1 DEO	300um Cipro	28.8472	23.1802	5.66698	-0.673587	1.59503
DEC	1	28.3892	28.3964		GAPDH	1	23.0457	23.0167
DEC	10	28.3457			GAPDH	10	22.7649
DEC	10	28.3168			GAPDH	10	22.7305
DEC	10	28.4773	28.3799		GAPDH	10	22.7815	22.7589
DEC	100	29.3502			GAPDH	100	23.2705
DEC	100	29.4762			GAPDH	100	23.39
DEC	100	29.4764	29.4343		GAPDH	100	23.4669	23.3758
DEC	300	28.7953			GAPDH	300	23.1341
DEC	300	28.8365			GAPDH	300	23.2022
DEC	300	28.9096	28.8472		GAPDH	300	23.2043	23.1802
n2											Summary
GOI	CPX conc.	Ct	mean Ct		HK Gene	CPX conc.	Ct	mean Ct			Gene of Interest (GOI)	Sample	Ct (GOI)	Ct GAPDH (REF)	∆Ct	∆∆Ct	fold
DEC	0	29.2873			GAPDH	0	22.5782				n2 DEC	Control (0)	29.2052	22.7983	6.40693	0	1
DEC	0	29.0825			GAPDH	0	23.1716				n2 DEC	1um Cipro	29.8857	23.1973	6.68841	0.28148	0.822747
DEC	0	29.2458	29.2052		GAPDH	0	22.645	22.7983			n2 DEC	10um Cipro	28.7167	23.2483	5.46845	-0.938481	1.91651
DEC	1	29.9268			GAPDH	1	23.1187				n2 DEC	100um Cipro	28.5705	23.0604	5.51005	-0.896876	1.86203
DEC	1	29.8275			GAPDH	1	23.2224				n2 DEC	300um Cipro	31.51	23.8365	7.67344	1.26651	0.415665
DEC	1	29.9026	29.8857		GAPDH	1	23.2506	23.1973
DEC	10	28.656			GAPDH	10	23.1199
DEC	10	28.7089			GAPDH	10	23.3039
DEC	10	28.7854	28.7167		GAPDH	10	23.3211	23.2483
DEC	100	28.601			GAPDH	100	22.9484
DEC	100	28.5058			GAPDH	100	23.0855
DEC	100	28.6045	28.5705		GAPDH	100	23.1473	23.0604
DEC	300	31.5659			GAPDH	300	23.7821
DEC	300	31.4476			GAPDH	300	23.8717
DEC	300	31.5164	31.51		GAPDH	300	23.8558	23.8365
n3											Summary
GOI	CPX conc.	Ct	mean Ct		HK Gene	CPX conc.	Ct	mean Ct			Gene of Interest (GOI)	Sample	Ct (GOI)	Ct GAPDH (REF)	∆Ct	∆∆Ct	fold
Dec	Control	22.2159			GAPDH	Control	23.2337				n3 DEC	Control (0)	22.1354	23.1816	-1.04623	0	1
Dec	Control	22.0757			GAPDH	Control	23.143				n3 DEC	1um Cipro	22.1287	23.2626	-1.13392	-0.08769	1.06267
Dec	Control	22.1145	22.1354		GAPDH	Control	23.168	23.1816			n3 DEC	10um Cipro	21.5391	23.2577	-1.7186	-0.672369	1.59369
Dec	1	22.0892			GAPDH	1	23.3801				n3 DEC	100um Cipro	22.0862	23.0321	-0.945892	0.100339	0.932814
Dec	1	22.131			GAPDH	1	23.1606				n3 DEC	300um Cipro	22.1477	23.2896	-1.14193	-0.0956967	1.06858
Dec	1	22.1658	22.1287		GAPDH	1	23.247	23.2626
Dec	10	21.5086			GAPDH	10	23.5597
Dec	10	21.4892			GAPDH	10	23.0988
Dec	10	21.6196	21.5391		GAPDH	10	23.1146	23.2577
Dec	100	22.0613			GAPDH	100	23.0523
Dec	100	22.1034			GAPDH	100	23.0377
Dec	100	22.0941	22.0862		GAPDH	100	23.0064	23.0321
Dec	300	22.1495			GAPDH	300	23.4192
Dec	300	22.1229			GAPDH	300	23.2382
Dec	300	22.1708	22.1477		GAPDH	300	23.2115	23.2896
n4											Summary
GOI	CPX conc.	Ct	mean Ct		HK Gene	CPX conc.	Ct	mean Ct			Gene of Interest (GOI)	Sample	Ct (GOI)	Ct GAPDH (REF)	∆Ct	∆∆Ct	fold
Decorin	0	24.0537			GAPDH	0	29.4375				n4 DEC	Control (0)	24.0598	29.3575	-5.2977	0	1
Decorin	0	24.0087			GAPDH	0	29.289				n4 DEC	1um Cipro	22.8167	28.7042	-5.88752	-0.589823	1.50506
Decorin	0	24.1171	24.0598		GAPDH	0	29.346	29.3575			n4 DEC	10um Cipro	24.189	29.4615	-5.27256	0.0251372	0.982727
Decorin	1	22.9073			GAPDH	1	28.746				n4 DEC	100um Cipro	23.6105	29.8336	-6.22302	-0.925318	1.8991
Decorin	1	22.7605			GAPDH	1	28.6686				n4 DEC	300um Cipro	23.1285	31.089	-7.9605	-2.66279	6.33258
Decorin	1	22.7823	22.8167		GAPDH	1	28.698	28.7042
Decorin	10	24.2312			GAPDH	10	29.4278
Decorin	10	24.1802			GAPDH	10	29.5598
Decorin	10	24.1555	24.189		GAPDH	10	29.397	29.4615
Decorin	100	23.5772			GAPDH	100	29.9906
Decorin	100	23.6125			GAPDH	100	29.8309
Decorin	100	23.6419	23.6105		GAPDH	100	29.6792	29.8336
Decorin	300	23.1216			GAPDH	300	31.1213
Decorin	300	23.1509			GAPDH	300	31.1097
Decorin	300	23.113	23.1285		GAPDH	300	31.036	31.089
n5											Summary
GOI	CPX conc.	Ct	mean Ct		HK Gene	CPX conc.	Ct	mean Ct			Gene of Interest (GOI)	Sample	Ct (GOI)	Ct GAPDH (REF)	∆Ct	∆∆Ct	fold
Dec	Control	22.8339			GAPDH	Control	24.0456				n5 DEC	Control (0)	22.8505	23.8635	-1.01302	0	1
Dec	Control	22.8303			GAPDH	Control	23.6739				n5 DEC	1um Cipro	22.567	23.1112	-0.544214	0.468804	0.722564
Dec	Control	22.8874	22.8505		GAPDH	Control	23.8711	23.8635			n5 DEC	10um Cipro	24.5528	24.5583	-0.00554054	1.00748	0.497415
Dec	1	22.6297			GAPDH	1	23.1847				n5 DEC	100um Cipro	23.4232	23.8286	-0.40543	0.607588	0.656293
Dec	1	22.5504			GAPDH	1	23.0454				n5 DEC	300um Cipro	23.922	24.0735	-0.151465	0.861553	0.55036
Dec	1	22.5208	22.567		GAPDH	1	23.1035	23.1112
Dec	10	24.574			GAPDH	10	24.7254
Dec	10	24.5038			GAPDH	10	24.4655
Dec	10	24.5805	24.5528		GAPDH	10	24.484	24.5583
Dec	100	23.4309			GAPDH	100	23.8431
Dec	100	23.3773			GAPDH	100	23.819
Dec	100	23.4613	23.4232		GAPDH	100	23.8236	23.8286
Dec	300	23.9276			GAPDH	300	24.0811
Dec	300	23.8903			GAPDH	300	24.0895
Dec	300	23.9482	23.922		GAPDH	300	24.0499	24.0735
n6											Summary
GOI	CPX conc.	Ct	mean Ct		HK Gene	CPX conc.	Ct	mean Ct			Gene of Interest (GOI)	Sample	Ct (GOI)	Ct GAPDH (REF)	∆Ct	∆∆Ct	fold
Dec	Control	22.8721			GAPDH	Control	30.1434				n6 DEC	Control (0)	22.7431	29.9285	-7.18542	0	1
Dec	Control	22.669			GAPDH	Control	29.7615				n6 DEC	1um Cipro	21.8427	28.7029	-6.86028	0.325139	0.798222
Dec	Control	22.6882	22.7431		GAPDH	Control	29.8806	29.9285			n6 DEC	10um Cipro	23.6111	30.7452	-7.1341	0.0513159	0.965056
Dec	1	21.9724			GAPDH	1	28.9106				n6 DEC	100um Cipro	24.2274	31.4704	-7.24298	-0.0575552	1.0407
Dec	1	21.7721			GAPDH	1	28.5569				n6 DEC	300um Cipro	23.3341	32.5539	-9.21982	-2.0344	4.09653
Dec	1	21.7834	21.8427		GAPDH	1	28.6413	28.7029
Dec	10	23.7726			GAPDH	10	30.6931
Dec	10	23.5394			GAPDH	10	30.7017
Dec	10	23.5211	23.6111		GAPDH	10	30.8406	30.7452
Dec	100	24.2665			GAPDH	100	31.616
Dec	100	24.1579			GAPDH	100	31.388
Dec	100	24.2578	24.2274		GAPDH	100	31.4071	31.4704
Dec	300	23.4072			GAPDH	300	32.5084
Dec	300	23.2662			GAPDH	300	32.6233
Dec	300	23.3289	23.3341		GAPDH	300	32.5301	32.5539

## Sheet: Biglycan PCR
n1											Summary
GOI	CPX conc.	Ct	mean Ct		HK Gene	CPX conc.	Ct	mean Ct			Gene of Interest (GOI)	Sample	Ct (GOI)	Ct GAPDH (REF)	∆Ct	∆∆Ct	fold
BIG	Control	24.4924			GAPDH	Control	23.049				n1 BIG	Control (0)	24.4793	23.123	1.3563	0	1
BIG	Control	24.4381			GAPDH	Control	23.1974				n1 BIG	1um Cipro	24.6748	23.1263	1.54859	0.192289	0.875216
BIG	Control	24.5073	24.4793		GAPDH	Control	23.1225	23.123			n1 BIG	10um Cipro	24.5913	22.7987	1.79262	0.436321	0.739017
BIG	1	24.7846			GAPDH	1	23.0467				n1 BIG	100um Cipro	25.1586	23.4679	1.69072	0.334421	0.793103
BIG	1	24.6608			GAPDH	1	23.1289				n1 BIG	300um Cipro	26.1314	23.2426	2.88882	1.53252	0.345673
BIG	1	24.5791	24.6748		GAPDH	1	23.2032	23.1263
BIG	10	24.5631			GAPDH	10	22.6808
BIG	10	24.559			GAPDH	10	22.8117
BIG	10	24.652	24.5913		GAPDH	10	22.9037	22.7987
BIG	100	25.1701			GAPDH	100	23.4875
BIG	100	25.1697			GAPDH	100	23.4756
BIG	100	25.136	25.1586		GAPDH	100	23.4405	23.4679
BIG	300	26.075			GAPDH	300	23.2528
BIG	300	26.1514			GAPDH	300	23.2293
BIG	300	26.1678	26.1314		GAPDH	300	23.2457	23.2426
n2											Summary
GOI	CPX conc.	Ct	mean Ct		HK Gene	CPX conc.	Ct	mean Ct			Gene of Interest (GOI)	Sample	Ct (GOI)	Ct GAPDH (REF)	∆Ct	∆∆Ct	fold
BIG	Control	24.8224			GAPDH	Control	22.5782				n2 BIG	Control (0)	24.7202	22.7983	1.92187	0	1
BIG	Control	24.8381			GAPDH	Control	23.1716				n2 BIG	1um Cipro	25.0739	23.1973	1.87669	-0.045176	1.03181
BIG	Control	24.5	24.7202		GAPDH	Control	22.645	22.7983			n2 BIG	10um Cipro	24.7884	23.2483	1.54009	-0.381779	1.30295
BIG	1	25.064			GAPDH	1	23.1187				n2 BIG	100um Cipro	25.596	23.0604	2.53558	0.613716	0.653511
BIG	1	25.055			GAPDH	1	23.2224				n2 BIG	300um Cipro	26.3442	23.8365	2.50771	0.585842	0.666261
BIG	1	25.1029	25.0739		GAPDH	1	23.2506	23.1973
BIG	10	24.6338			GAPDH	10	23.1199
BIG	10	24.9986			GAPDH	10	23.3039
BIG	10	24.7327	24.7884		GAPDH	10	23.3211	23.2483
BIG	100	25.5299			GAPDH	100	22.9484
BIG	100	25.5803			GAPDH	100	23.0855
BIG	100	25.6777	25.596		GAPDH	100	23.1473	23.0604
BIG	300	26.2545			GAPDH	300	23.7821
BIG	300	26.3434			GAPDH	300	23.8717
BIG	300	26.4348	26.3442		GAPDH	300	23.8558	23.8365
n3											Summary
GOI	CPX conc.	Ct	mean Ct		HK Gene	CPX conc.	Ct	mean Ct			Gene of Interest (GOI)	Sample	Ct (GOI)	Ct GAPDH (REF)	∆Ct	∆∆Ct	fold
Big	Control	31.0481			GAPDH	Control	23.2337				n3 BIG	Control (0)	31.0737	23.1816	7.89213	0	1
Big	Control	31.1435			GAPDH	Control	23.143				n3 BIG	1um Cipro	30.6293	23.2626	7.36674	-0.525382	1.43931
Big	Control	31.0295	31.0737		GAPDH	Control	23.168	23.1816			n3 BIG	10um Cipro	30.7596	23.2577	7.50187	-0.390261	1.31063
Big	1	30.6302			GAPDH	1	23.3801				n3 BIG	100um Cipro	30.752	23.0321	7.71983	-0.172297	1.12685
Big	1	30.5452			GAPDH	1	23.1606				n3 BIG	300um Cipro	31.1832	23.2896	7.89357	0.00144404	0.999
Big	1	30.7125	30.6293		GAPDH	1	23.247	23.2626
Big	10	30.7839			GAPDH	10	23.5597
Big	10	30.6763			GAPDH	10	23.0988
Big	10	30.8185	30.7596		GAPDH	10	23.1146	23.2577
Big	100	30.8881			GAPDH	100	23.0523
Big	100	30.6997			GAPDH	100	23.0377
Big	100	30.6681	30.752		GAPDH	100	23.0064	23.0321
Big	300	31.1943			GAPDH	300	23.4192
Big	300	31.1948			GAPDH	300	23.2382
Big	300	31.1606	31.1832		GAPDH	300	23.2115	23.2896
n4											Summary
GOI	CPX conc.	Ct	mean Ct		HK Gene	CPX conc.	Ct	mean Ct			Gene of Interest (GOI)	Sample	Ct (GOI)	Ct GAPDH (REF)	∆Ct	∆∆Ct	fold
Biglycan	Control	30.2099			GAPDH	Control	29.4375				n4 BIG	Control (0)	30.2173	29.3575	0.859786	0	1
Biglycan	Control	30.1477			GAPDH	Control	29.289				n4 BIG	1um Cipro	30.9151	28.7042	2.21094	1.35115	0.391979
Biglycan	Control	30.2943	30.2173		GAPDH	Control	29.346	29.3575			n4 BIG	10um Cipro	29.6226	29.4615	0.16107	-0.698716	1.62306
Biglycan	1	30.9125			GAPDH	1	28.746				n4 BIG	100um Cipro	30.3515	29.8336	0.517997	-0.341789	1.26733
Biglycan	1	30.9273			GAPDH	1	28.6686				n4 BIG	300um Cipro	33.4498	31.089	2.36073	1.50095	0.353321
Biglycan	1	30.9055	30.9151		GAPDH	1	28.698	28.7042
Biglycan	10	29.6493			GAPDH	10	29.4278
Biglycan	10	29.5924			GAPDH	10	29.5598
Biglycan	10	29.6261	29.6226		GAPDH	10	29.397	29.4615
Biglycan	100	30.4688			GAPDH	100	29.9906
Biglycan	100	30.3323			GAPDH	100	29.8309
Biglycan	100	30.2536	30.3515		GAPDH	100	29.6792	29.8336
Biglycan	300	33.3605			GAPDH	300	31.1213
Biglycan	300	33.5227			GAPDH	300	31.1097
Biglycan	300	33.4661	33.4498		GAPDH	300	31.036	31.089
n5											Summary
GOI	CPX conc.	Ct	mean Ct		HK Gene	CPX conc.	Ct	mean Ct			Gene of Interest (GOI)	Sample	Ct (GOI)	Ct GAPDH (REF)	∆Ct	∆∆Ct	fold
Big	Control	30.8392			GAPDH	Control	24.0456				n5 BIG	Control (0)	30.8008	23.8635	6.93726	0	1
Big	Control	30.7801			GAPDH	Control	23.6739				n5 BIG	1um Cipro	31.0744	23.1112	7.96317	1.02591	0.491102
Big	Control	30.7832	30.8008		GAPDH	Control	23.8711	23.8635			n5 BIG	10um Cipro	31.2332	24.5583	6.67488	-0.262377	1.19945
Big	1	32.1234			GAPDH	1	23.1847				n5 BIG	100um Cipro	30.914	23.8286	7.08541	0.148153	0.902405
Big	1	30.5351			GAPDH	1	23.0454				n5 BIG	300um Cipro	30.5248	24.0735	6.4513	-0.485962	1.40052
Big	1	30.5646	31.0744		GAPDH	1	23.1035	23.1112
Big	10	31.4623			GAPDH	10	24.7254
Big	10	31.1405			GAPDH	10	24.4655
Big	10	31.0968	31.2332		GAPDH	10	24.484	24.5583
Big	100	31.0948			GAPDH	100	23.8431
Big	100	30.8775			GAPDH	100	23.819
Big	100	30.7697	30.914		GAPDH	100	23.8236	23.8286
Big	300	30.4324			GAPDH	300	24.0811
Big	300	30.5621			GAPDH	300	24.0895
Big	300	30.5799	30.5248		GAPDH	300	24.0499	24.0735
n6											Summary
GOI	CPX conc.	Ct	mean Ct		HK Gene	CPX conc.	Ct	mean Ct			Gene of Interest (GOI)	Sample	Ct (GOI)	Ct GAPDH (REF)	∆Ct	∆∆Ct	fold
Big	Control	31.1599			GAPDH	Control	30.1434				n6 BIG	Control (0)	31.1731	29.9285	1.24457	0	1
Big	Control	31.1494			GAPDH	Control	29.7615				n6 BIG	1um Cipro	31.0452	28.7029	2.34224	1.09767	0.467271
Big	Control	31.21	31.1731		GAPDH	Control	29.8806	29.9285			n6 BIG	10um Cipro	30.5802	30.7452	-0.164963	-1.40953	2.65651
Big	1	31.1482			GAPDH	1	28.9106				n6 BIG	100um Cipro	31.2732	31.4704	-0.197159	-1.44173	2.71646
Big	1	30.9096			GAPDH	1	28.5569				n6 BIG	300um Cipro	34.24	32.5539	1.68604	0.441471	0.736383
Big	1	31.0776	31.0452		GAPDH	1	28.6413	28.7029
Big	10	30.8269			GAPDH	10	30.6931
Big	10	30.4553			GAPDH	10	30.7017
Big	10	30.4584	30.5802		GAPDH	10	30.8406	30.7452
Big	100	31.3808			GAPDH	100	31.616
Big	100	31.2455			GAPDH	100	31.388
Big	100	31.1934	31.2732		GAPDH	100	31.4071	31.4704
Big	300	34.2249			GAPDH	300	32.5084
Big	300	34.2671			GAPDH	300	32.6233
Big	300	34.2279	34.24		GAPDH	300	32.5301	32.5539

## Sheet: Fibromodulin PCR
n1											Summary
GOI	CPX conc.	Ct	mean Ct		HK Gene	CPX conc.	Ct	mean Ct			Gene of Interest (GOI)	Sample	Ct (GOI)	Ct GAPDH (REF)	∆Ct	∆∆Ct	fold
FIB	Control	32.8426			GAPDH	Control	22.8303				n1 FIB	Control (0)	32.8929	22.8923	10.0006	0	1
FIB	Control	33.0083			GAPDH	Control	22.8716				n1 FIB	1um Cipro	32.4914	23.0167	9.47474	-0.525823	1.43976
FIB	Control	32.8278	32.8929		GAPDH	Control	22.975	22.8923			n1 FIB	10um Cipro	32.6315	22.7589	9.8726	-0.127961	1.09275
FIB	1	32.3286			GAPDH	1	22.9778				n1 FIB	100um Cipro	33.4859	23.3758	10.11	0.109468	0.92693
FIB	1	32.5114			GAPDH	1	23.0265				n1 FIB	300um Cipro	33.2128	23.1802	10.0326	0.0320297	0.978043
FIB	1	32.6342	32.4914		GAPDH	1	23.0457	23.0167
FIB	10	33.0442			GAPDH	10	22.7649
FIB	10	32.4106			GAPDH	10	22.7305
FIB	10	32.4398	32.6315		GAPDH	10	22.7815	22.7589
FIB	100	33.3555			GAPDH	100	23.2705
FIB	100	33.3687			GAPDH	100	23.39
FIB	100	33.7334	33.4859		GAPDH	100	23.4669	23.3758
FIB	300	33.2206			GAPDH	300	23.1341
FIB	300	33.1607			GAPDH	300	23.2022
FIB	300	33.2571	33.2128		GAPDH	300	23.2043	23.1802
n2											Summary
GOI	CPX conc.	Ct	mean Ct		HK Gene	CPX conc.	Ct	mean Ct			Gene of Interest (GOI)	Sample	Ct (GOI)	Ct GAPDH (REF)	∆Ct	∆∆Ct	fold
FIB	Control	33.1422			GAPDH	Control	22.5782				n2 FIB	Control (0)	33.0627	22.7983	10.2645	0	1
FIB	Control	32.9083			GAPDH	Control	23.1716				n2 FIB	1um Cipro	33.3314	23.1973	10.1341	-0.130339	1.09455
FIB	Control	33.1378	33.0627		GAPDH	Control	22.645	22.7983			n2 FIB	10um Cipro	32.4135	23.2483	9.16523	-1.09924	2.14242
FIB	1	33.3635			GAPDH	1	23.1187				n2 FIB	100um Cipro	33.8945	23.0604	10.8341	0.569616	0.673796
FIB	1	33.2966			GAPDH	1	23.2224				n2 FIB	300um Cipro	35.2264	23.8365	11.3899	1.12544	0.458363
FIB	1	33.3341	33.3314		GAPDH	1	23.2506	23.1973
FIB	10	32.3529			GAPDH	10	23.1199
FIB	10	32.4169			GAPDH	10	23.3039
FIB	10	32.4707	32.4135		GAPDH	10	23.3211	23.2483
FIB	100	33.9555			GAPDH	100	22.9484
FIB	100	33.6573			GAPDH	100	23.0855
FIB	100	34.0706	33.8945		GAPDH	100	23.1473	23.0604
FIB	300	35.1447			GAPDH	300	23.7821
FIB	300	34.7425			GAPDH	300	23.8717
FIB	300	35.7921	35.2264		GAPDH	300	23.8558	23.8365
n3											Summary
GOI	CPX conc.	Ct	mean Ct		HK Gene	CPX conc.	Ct	mean Ct			Gene of Interest (GOI)	Sample	Ct (GOI)	Ct GAPDH (REF)	∆Ct	∆∆Ct	fold
Fibromodulin	Control	35.6212			GAPDH	Control	21.979				n3 FIB	Control (0)	35.9684	21.9942	13.9742	0	1
Fibromodulin	Control	36.3973			GAPDH	Control	21.9041				n3 FIB	1um Cipro	37.6412	23.234	14.4073	0.433103	0.740667
Fibromodulin	Control	35.8865	35.9684		GAPDH	Control	22.0996	21.9942			n3 FIB	10um Cipro	36.4687	22.5396	13.9291	-0.0450716	1.03173
Fibromodulin	1	37.0737			GAPDH	1	23.2479				n3 FIB	100um Cipro	35.1726	21.8314	13.3412	-0.632977	1.55076
Fibromodulin	1	38.0477			GAPDH	1	23.2675				n3 FIB	300um Cipro	36.8025	22.2645	14.538	0.563847	0.676496
Fibromodulin	1	37.8023	37.6412		GAPDH	1	23.1866	23.234
Fibromodulin	10	36.623			GAPDH	10	22.6083
Fibromodulin	10	36.2527			GAPDH	10	22.5217
Fibromodulin	10	36.5305	36.4687		GAPDH	10	22.4888	22.5396
Fibromodulin	100	35.8864			GAPDH	100	21.827
Fibromodulin	100	34.9746			GAPDH	100	21.7223
Fibromodulin	100	34.6568	35.1726		GAPDH	100	21.9449	21.8314
Fibromodulin	300	36.7248			GAPDH	300	22.2691
Fibromodulin	300	36.5804			GAPDH	300	22.2446
Fibromodulin	300	37.1022	36.8025		GAPDH	300	22.2797	22.2645
n4											Summary
GOI	CPX conc.	Ct	mean Ct		HK Gene	CPX conc.	Ct	mean Ct			Gene of Interest (GOI)	Sample	Ct (GOI)	Ct GAPDH (REF)	∆Ct	∆∆Ct	fold
Fibromodulin	Control	31.8758			GAPDH	Control	29.4375				n4 FIB	Control (0)	31.9634	29.3575	2.60591	0	1
Fibromodulin	Control	31.8977			GAPDH	Control	29.289				n4 FIB	1um Cipro	31.0295	28.7042	2.3253	-0.280603	1.2147
Fibromodulin	Control	32.1167	31.9634		GAPDH	Control	29.346	29.3575			n4 FIB	10um Cipro	32.1777	29.4615	2.71618	0.110274	0.926412
Fibromodulin	1	31.1543			GAPDH	1	28.746				n4 FIB	100um Cipro	31.8692	29.8336	2.03563	-0.570278	1.48481
Fibromodulin	1	30.9369			GAPDH	1	28.6686				n4 FIB	300um Cipro	34.2355	31.089	3.14653	0.54062	0.687475
Fibromodulin	1	30.9973	31.0295		GAPDH	1	28.698	28.7042
Fibromodulin	10	32.1931			GAPDH	10	29.4278
Fibromodulin	10	32.1324			GAPDH	10	29.5598
Fibromodulin	10	32.2077	32.1777		GAPDH	10	29.397	29.4615
Fibromodulin	100	32.083			GAPDH	100	29.9906
Fibromodulin	100	31.7614			GAPDH	100	29.8309
Fibromodulin	100	31.7632	31.8692		GAPDH	100	29.6792	29.8336
Fibromodulin	300	34.0723			GAPDH	300	31.1213
Fibromodulin	300	33.7542			GAPDH	300	31.1097
Fibromodulin	300	34.8801	34.2355		GAPDH	300	31.036	31.089
n5											Summary
GOI	CPX conc.	Ct	mean Ct		HK Gene	CPX conc.	Ct	mean Ct			Gene of Interest (GOI)	Sample	Ct (GOI)	Ct GAPDH (REF)	∆Ct	∆∆Ct	fold
Fib	Control	31.7429			GAPDH	Control	24.0456				n5 FIB	Control (0)	31.7519	23.8635	7.88831	0	1
Fib	Control	31.712			GAPDH	Control	23.6739				n5 FIB	1um Cipro	32.1065	23.1112	8.9953	1.10699	0.464261
Fib	Control	31.8006	31.7519		GAPDH	Control	23.8711	23.8635			n5 FIB	10um Cipro	33.8592	24.5583	9.30091	1.41259	0.375636
Fib	1	32.5386			GAPDH	1	23.1847				n5 FIB	100um Cipro	32.969	23.8286	9.1404	1.25208	0.419841
Fib	1	31.9022			GAPDH	1	23.0454				n5 FIB	300um Cipro	32.9542	24.0735	8.88073	0.992412	0.502637
Fib	1	31.8787	32.1065		GAPDH	1	23.1035	23.1112
Fib	10	34.0701			GAPDH	10	24.7254
Fib	10	33.8346			GAPDH	10	24.4655
Fib	10	33.673	33.8592		GAPDH	10	24.484	24.5583
Fib	100	33.0316			GAPDH	100	23.8431
Fib	100	32.8697			GAPDH	100	23.819
Fib	100	33.0057	32.969		GAPDH	100	23.8236	23.8286
Fib	300	32.8949			GAPDH	300	24.0811
Fib	300	32.9988			GAPDH	300	24.0895
Fib	300	32.969	32.9542		GAPDH	300	24.0499	24.0735
n6											Summary
GOI	CPX conc.	Ct	mean Ct		HK Gene	CPX conc.	Ct	mean Ct			Gene of Interest (GOI)	Sample	Ct (GOI)	Ct GAPDH (REF)	∆Ct	∆∆Ct	fold
Fib	Control	31.2115			GAPDH	Control	30.1434				n6 FIB	Control (0)	31.2335	29.9285	1.30499	0	1
Fib	Control	31.1592			GAPDH	Control	29.7615				n6 FIB	1um Cipro	30.9429	28.7029	2.23998	0.934986	0.523047
Fib	Control	31.3298	31.2335		GAPDH	Control	29.8806	29.9285			n6 FIB	10um Cipro	31.5912	30.7452	0.846028	-0.458962	1.37455
Fib	1	30.8451			GAPDH	1	28.9106				n6 FIB	100um Cipro	32.2623	31.4704	0.791951	-0.513039	1.42705
Fib	1	30.9212			GAPDH	1	28.5569				n6 FIB	300um Cipro	33.1469	32.5539	0.592938	-0.712051	1.63813
Fib	1	31.0625	30.9429		GAPDH	1	28.6413	28.7029
Fib	10	31.6995			GAPDH	10	30.6931
Fib	10	31.4822			GAPDH	10	30.7017
Fib	10	31.5918	31.5912		GAPDH	10	30.8406	30.7452
Fib	100	32.2359			GAPDH	100	31.616
Fib	100	32.21			GAPDH	100	31.388
Fib	100	32.341	32.2623		GAPDH	100	31.4071	31.4704
Fib	300	33.1527			GAPDH	300	32.5084
Fib	300	33.1218			GAPDH	300	32.6233
Fib	300	33.1661	33.1469		GAPDH	300	32.5301	32.5539

## Sheet: Aggrecan PCR
n1											Summary
GOI	CPX conc.	Ct	mean Ct		HK Gene	CPX conc.	Ct	mean Ct			Gene of Interest (GOI)	Sample	Ct (GOI)	Ct GAPDH (REF)	∆Ct	∆∆Ct	fold
AGG	Control	29.4416			GAPDH	Control	24.143				n1 AGG	Control (0)	29.4404	24.0852	5.35516	0	1
AGG	Control	29.5453			GAPDH	Control	24.0471				n1 AGG	1um Cipro	30.2155	23.6629	6.55264	1.19748	0.436036
AGG	Control	29.3343	29.4404		GAPDH	Control	24.0656	24.0852			n1 AGG	10um Cipro	31.1921	23.4354	7.75667	2.4015	0.189267
AGG	1	30.3233			GAPDH	1	23.5234				n1 AGG	100um Cipro	28.9939	23.8777	5.11624	-0.238921	1.18011
AGG	1	30.1531			GAPDH	1	23.6529				n1 AGG	300um Cipro	32.2892	23.4829	8.80629	3.45112	0.0914342
AGG	1	30.17	30.2155		GAPDH	1	23.8122	23.6629
AGG	10	31.0309			GAPDH	10	23.2822
AGG	10	31.1775			GAPDH	10	23.5242
AGG	10	31.3678	31.1921		GAPDH	10	23.4998	23.4354
AGG	100	28.8956			GAPDH	100	23.871
AGG	100	29.0385			GAPDH	100	23.9275
AGG	100	29.0476	28.9939		GAPDH	100	23.8346	23.8777
AGG	300	32.4024			GAPDH	300	23.7007
AGG	300	32.6505			GAPDH	300	23.3526
AGG	300	31.8147	32.2892		GAPDH	300	23.3956	23.4829
n2											Summary
GOI	CPX conc.	Ct	mean Ct		HK Gene	CPX conc.	Ct	mean Ct			Gene of Interest (GOI)	Sample	Ct (GOI)	Ct GAPDH (REF)	∆Ct	∆∆Ct	fold
AGG	Control	29.8416			GAPDH	Control	24.5132				n2 AGG	Control (0)	29.8705	24.5407	5.32972	0	1
AGG	Control	29.9235			GAPDH	Control	24.3471				n2 AGG	1um Cipro	30.3113	25.4596	4.85173	-0.477987	1.3928
AGG	Control	29.8462	29.8705		GAPDH	Control	24.7618	24.5407			n2 AGG	10um Cipro	30.6875	24.2634	6.42413	1.09441	0.468329
AGG	1	30.3792			GAPDH	1	23.4942				n2 AGG	100um Cipro	33.9409	23.7386	10.2023	4.87259	0.0341354
AGG	1	30.4076			GAPDH	1	29.2133				n2 AGG	300um Cipro	34.7055	24.2386	10.4669	5.13721	0.0284149
AGG	1	30.1471	30.3113		GAPDH	1	23.6712	25.4596
AGG	10	30.9723			GAPDH	10	24.1804
AGG	10	30.5907			GAPDH	10	24.2462
AGG	10	30.4996	30.6875		GAPDH	10	24.3635	24.2634
AGG	100	33.8774			GAPDH	100	23.6585
AGG	100	33.4318			GAPDH	100	23.9388
AGG	100	34.5136	33.9409		GAPDH	100	23.6185	23.7386
AGG	300	35.4602			GAPDH	300	24.3372
AGG	300	34.8301			GAPDH	300	24.2128
AGG	300	33.8263	34.7055		GAPDH	300	24.1658	24.2386
n3											Summary
GOI	CPX conc.	Ct	mean Ct		HK Gene	CPX conc.	Ct	mean Ct			Gene of Interest (GOI)	Sample	Ct (GOI)	Ct GAPDH (REF)	∆Ct	∆∆Ct	fold
Aggrecan	Control	27.4441			GAPDH	Control	25.4455				n3 AGG	Control (0)	27.5191	25.6013	1.91776	0	1
Aggrecan	Control	27.2777			GAPDH	Control	25.6818				n3 AGG	1um Cipro	28.1471	25.1824	2.96476	1.047	0.483973
Aggrecan	Control	27.8353	27.5191		GAPDH	Control	25.6766	25.6013			n3 AGG	10um Cipro	28.5577	25.3242	3.23343	1.31567	0.401738
Aggrecan	1	28.2114			GAPDH	1	24.8183				n3 AGG	100um Cipro	29.5087	26.5356	2.97311	1.05535	0.481182
Aggrecan	1	28.1168			GAPDH	1	24.8355				n3 AGG	300um Cipro	27.4142	25.2618	2.15245	0.234693	0.849866
Aggrecan	1	28.1132	28.1471		GAPDH	1	25.8933	25.1824
Aggrecan	10	28.4844			GAPDH	10	25.3087
Aggrecan	10	28.6113			GAPDH	10	25.3348
Aggrecan	10	28.5773	28.5577		GAPDH	10	25.3292	25.3242
Aggrecan	100	29.5205			GAPDH	100	26.5861
Aggrecan	100	29.5073			GAPDH	100	26.5259
Aggrecan	100	29.4981	29.5087		GAPDH	100	26.4947	26.5356
Aggrecan	300	27.3516			GAPDH	300	25.2737
Aggrecan	300	27.5145			GAPDH	300	25.2557
Aggrecan	300	27.3765	27.4142		GAPDH	300	25.2559	25.2618
n4											Summary
GOI	CPX conc.	Ct	mean Ct		HK Gene	CPX conc.	Ct	mean Ct			Gene of Interest (GOI)	Sample	Ct (GOI)	Ct GAPDH (REF)	∆Ct	∆∆Ct	fold
Aggrecan	Control	26.7577			GAPDH	Control	29.4375				n4 AGG	Control (0)	26.7338	29.3575	-2.62368	0	1
Aggrecan	Control	26.7501			GAPDH	Control	29.289				n4 AGG	1um Cipro	26.5212	28.7042	-2.18301	0.440678	0.736788
Aggrecan	Control	26.6937	26.7338		GAPDH	Control	29.346	29.3575			n4 AGG	10um Cipro	26.7072	29.4615	-2.75432	-0.130633	1.09477
Aggrecan	1	26.5267			GAPDH	1	28.746				n4 AGG	100um Cipro	26.8314	29.8336	-3.00215	-0.378462	1.29995
Aggrecan	1	26.488			GAPDH	1	28.6686				n4 AGG	300um Cipro	28.1927	31.089	-2.89627	-0.272591	1.20798
Aggrecan	1	26.5489	26.5212		GAPDH	1	28.698	28.7042
Aggrecan	10	26.7322			GAPDH	10	29.4278
Aggrecan	10	26.6943			GAPDH	10	29.5598
Aggrecan	10	26.6951	26.7072		GAPDH	10	29.397	29.4615
Aggrecan	100	26.8871			GAPDH	100	29.9906
Aggrecan	100	26.8148			GAPDH	100	29.8309
Aggrecan	100	26.7922	26.8314		GAPDH	100	29.6792	29.8336
Aggrecan	300	28.1158			GAPDH	300	31.1213
Aggrecan	300	28.1719			GAPDH	300	31.1097
Aggrecan	300	28.2905	28.1927		GAPDH	300	31.036	31.089
n5											Summary
GOI	CPX conc.	Ct	mean Ct		HK Gene	CPX conc.	Ct	mean Ct			Gene of Interest (GOI)	Sample	Ct (GOI)	Ct GAPDH (REF)	∆Ct	∆∆Ct	fold
Agg	Control	27.9145			GAPDH	Control	24.0456				n5 AGG	Control (0)	27.8933	23.8635	4.02979	0	1
Agg	Control	27.8884			GAPDH	Control	23.6739				n5 AGG	1um Cipro	27.6217	23.1112	4.51052	0.480727	0.716617
Agg	Control	27.8771	27.8933		GAPDH	Control	23.8711	23.8635			n5 AGG	10um Cipro	28.3849	24.5583	3.8266	-0.20319	1.15124
Agg	1	27.6403			GAPDH	1	23.1847				n5 AGG	100um Cipro	28.6132	23.8286	4.78457	0.754776	0.592638
Agg	1	27.5656			GAPDH	1	23.0454				n5 AGG	300um Cipro	27.5861	24.0735	3.51264	-0.517153	1.43113
Agg	1	27.6593	27.6217		GAPDH	1	23.1035	23.1112
Agg	10	28.4001			GAPDH	10	24.7254
Agg	10	28.3936			GAPDH	10	24.4655
Agg	10	28.3611	28.3849		GAPDH	10	24.484	24.5583
Agg	100	28.6146			GAPDH	100	23.8431
Agg	100	28.6172			GAPDH	100	23.819
Agg	100	28.6077	28.6132		GAPDH	100	23.8236	23.8286
Agg	300	27.5652			GAPDH	300	24.0811
Agg	300	27.5243			GAPDH	300	24.0895
Agg	300	27.669	27.5861		GAPDH	300	24.0499	24.0735
n6											Summary
GOI	CPX conc.	Ct	mean Ct		HK Gene	CPX conc.	Ct	mean Ct			Gene of Interest (GOI)	Sample	Ct (GOI)	Ct GAPDH (REF)	∆Ct	∆∆Ct	fold
Agg	Control	28.2231			GAPDH	Control	30.1434				n6 AGG	Control (0)	28.171	29.9285	-1.75755	0	1
Agg	Control	28.1658			GAPDH	Control	29.7615				n6 AGG	1um Cipro	26.9103	28.7029	-1.7926	-0.0350481	1.02459
Agg	Control	28.1241	28.171		GAPDH	Control	29.8806	29.9285			n6 AGG	10um Cipro	26.646	30.7452	-4.0992	-2.34165	5.06882
Agg	1	26.9053			GAPDH	1	28.9106				n6 AGG	100um Cipro	26.9441	31.4704	-4.52626	-2.76871	6.81497
Agg	1	26.8177			GAPDH	1	28.5569				n6 AGG	300um Cipro	28.341	32.5539	-4.21292	-2.45537	5.48453
Agg	1	27.008	26.9103		GAPDH	1	28.6413	28.7029
Agg	10	26.6378			GAPDH	10	30.6931
Agg	10	26.6112			GAPDH	10	30.7017
Agg	10	26.6889	26.646		GAPDH	10	30.8406	30.7452
Agg	100	27.2073			GAPDH	100	31.616
Agg	100	26.8255			GAPDH	100	31.388
Agg	100	26.7996	26.9441		GAPDH	100	31.4071	31.4704
Agg	300	28.336			GAPDH	300	32.5084
Agg	300	28.2927			GAPDH	300	32.6233
Agg	300	28.3943	28.341		GAPDH	300	32.5301	32.5539

## Sheet: Versican PCR
n1											Summary
GOI	CPX conc.	Ct	mean Ct		HK Gene	CPX conc.	Ct	mean Ct			Gene of Interest (GOI)	Sample	Ct (GOI)	Ct GAPDH (REF)	∆Ct	∆∆Ct	fold
VERS	0a	28.851			GAPDH	0a	24.143				n1 VER	Control (0)	28.7714	24.0852	4.68612	0	1
VERS	0a	28.431			GAPDH	0a	24.0471				n1 VER	1um Cipro	28.483	23.6629	4.82011	0.133983	0.911312
VERS	0a	29.0321	28.7714		GAPDH	0a	24.0656	24.0852			n1 VER	10um Cipro	28.4206	23.4354	4.98523	0.299112	0.812752
VERS	1a	28.6918			GAPDH	1a	23.5234				n1 VER	100um Cipro	29.9979	23.8777	6.12019	1.43407	0.370085
VERS	1a	28.5193			GAPDH	1a	23.6529				n1 VER	300um Cipro	30.0026	23.4829	6.5196	1.83348	0.280587
VERS	1a	28.2378	28.483		GAPDH	1a	23.8122	23.6629
VERS	10a	27.9811			GAPDH	10a	23.2822
VERS	10a	28.6325			GAPDH	10a	23.5242
VERS	10a	28.6484	28.4206		GAPDH	10a	23.4998	23.4354
VERS	100a	29.9591			GAPDH	100a	23.871
VERS	100a	29.9628			GAPDH	100a	23.9275
VERS	100a	30.0718	29.9979		GAPDH	100a	23.8346	23.8777
VERS	300a	30.1634			GAPDH	300a	23.7007
VERS	300a	29.832			GAPDH	300a	23.3526
VERS	300a	30.0123	30.0026		GAPDH	300a	23.3956	23.4829
n2											Summary
GOI	CPX conc.	Ct	mean Ct		HK Gene	CPX conc.	Ct	mean Ct			Gene of Interest (GOI)	Sample	Ct (GOI)	Ct GAPDH (REF)	∆Ct	∆∆Ct	fold
VERS	Control	29.1544			GAPDH	Control	24.5132				n2 VER	Control (0)	29.089	24.5407	4.54822	0	1
VERS	Control	28.9803			GAPDH	Control	24.3471				n2 VER	1um Cipro	28.7539	25.4596	3.29438	-1.25384	2.38475
VERS	Control	29.1321	29.089		GAPDH	Control	24.7618	24.5407			n2 VER	10um Cipro	29.0669	24.2634	4.80347	0.255251	0.837841
VERS	1	28.6344			GAPDH	1	23.4942				n2 VER	100um Cipro	31.5043	23.7386	7.76572	3.21749	0.107507
VERS	1	28.8049			GAPDH	1	29.2133				n2 VER	300um Cipro	30.5015	24.2386	6.26294	1.71472	0.304662
VERS	1	28.8225	28.7539		GAPDH	1	23.6712	25.4596
VERS	10	28.8815			GAPDH	10	24.1804
VERS	10	29.1533			GAPDH	10	24.2462
VERS	10	29.1657	29.0669		GAPDH	10	24.3635	24.2634
VERS	100	31.3936			GAPDH	100	23.6585
VERS	100	31.4644			GAPDH	100	23.9388
VERS	100	31.6549	31.5043		GAPDH	100	23.6185	23.7386
VERS	300	30.3991			GAPDH	300	24.3372
VERS	300	30.4883			GAPDH	300	24.2128
VERS	300	30.6173	30.5015		GAPDH	300	24.1658	24.2386
n3											Summary
GOI	CPX conc.	Ct	mean Ct		HK Gene	CPX conc.	Ct	mean Ct			Gene of Interest (GOI)	Sample	Ct (GOI)	Ct GAPDH (REF)	∆Ct	∆∆Ct	fold
Versican	Control	31.5619			GAPDH	Control	25.4455				n3 VER	Control (0)	31.6506	25.6013	6.04931	0	1
Versican	Control	31.7219			GAPDH	Control	25.6818				n3 VER	1um Cipro	32.2621	25.1824	7.07978	1.03047	0.489552
Versican	Control	31.6681	31.6506		GAPDH	Control	25.6766	25.6013			n3 VER	10um Cipro	35.4231	25.3242	10.0989	4.04956	0.0603896
Versican	1	32.2401			GAPDH	1	24.8183				n3 VER	100um Cipro	32.4438	26.5356	5.90821	-0.141098	1.10274
Versican	1	32.268			GAPDH	1	24.8355				n3 VER	300um Cipro	32.2847	25.2618	7.02295	0.973643	0.509218
Versican	1	32.2783	32.2621		GAPDH	1	25.8933	25.1824
Versican	10	35.3788			GAPDH	10	25.3087
Versican	10	35.8726			GAPDH	10	25.3348
Versican	10	35.0179	35.4231		GAPDH	10	25.3292	25.3242
Versican	100	32.6596			GAPDH	100	26.5861
Versican	100	32.3839			GAPDH	100	26.5259
Versican	100	32.2878	32.4438		GAPDH	100	26.4947	26.5356
Versican	300	32.3334			GAPDH	300	25.2737
Versican	300	32.4162			GAPDH	300	25.2557
Versican	300	32.1045	32.2847		GAPDH	300	25.2559	25.2618
n4											Summary
GOI	CPX conc.	Ct	mean Ct		HK Gene	CPX conc.	Ct	mean Ct			Gene of Interest (GOI)	Sample	Ct (GOI)	Ct GAPDH (REF)	∆Ct	∆∆Ct	fold
Versican	Control	30.3331			GAPDH	Control	29.4375				n4 VER	Control (0)	29.9916	29.3575	0.634076	0	1
Versican	Control	29.7938			GAPDH	Control	29.289				n4 VER	1um Cipro	29.6969	28.7042	0.992734	0.358659	0.779889
Versican	Control	29.8478	29.9916		GAPDH	Control	29.346	29.3575			n4 VER	10um Cipro	29.613	29.4615	0.151487	-0.482589	1.39725
Versican	1	29.6386			GAPDH	1	28.746				n4 VER	100um Cipro	30.9866	29.8336	1.15306	0.518987	0.697862
Versican	1	29.7343			GAPDH	1	28.6686				n4 VER	300um Cipro	32.9352	31.089	1.8462	1.21212	0.431633
Versican	1	29.7178	29.6969		GAPDH	1	28.698	28.7042
Versican	10	29.5502			GAPDH	10	29.4278
Versican	10	29.62			GAPDH	10	29.5598
Versican	10	29.6688	29.613		GAPDH	10	29.397	29.4615
Versican	100	31.1457			GAPDH	100	29.9906
Versican	100	30.8863			GAPDH	100	29.8309
Versican	100	30.9278	30.9866		GAPDH	100	29.6792	29.8336
Versican	300	32.9088			GAPDH	300	31.1213
Versican	300	32.8538			GAPDH	300	31.1097
Versican	300	33.043	32.9352		GAPDH	300	31.036	31.089
n5											Summary
GOI	CPX conc.	Ct	mean Ct		HK Gene	CPX conc.	Ct	mean Ct			Gene of Interest (GOI)	Sample	Ct (GOI)	Ct GAPDH (REF)	∆Ct	∆∆Ct	fold
Ver	Control	30.1177			GAPDH	Control	24.0456				n5 VER	Control (0)	30.0344	23.8635	6.17085	0	1
Ver	Control	30.0498			GAPDH	Control	23.6739				n5 VER	1um Cipro	29.5439	23.1112	6.4327	0.261849	0.834019
Ver	Control	29.9357	30.0344		GAPDH	Control	23.8711	23.8635			n5 VER	10um Cipro	31.7266	24.5583	7.16827	0.997425	0.500893
Ver	1	29.628			GAPDH	1	23.1847				n5 VER	100um Cipro	31.1181	23.8286	7.28948	1.11863	0.46053
Ver	1	29.447			GAPDH	1	23.0454				n5 VER	300um Cipro	30.8601	24.0735	6.78663	0.615784	0.652575
Ver	1	29.5568	29.5439		GAPDH	1	23.1035	23.1112
Ver	10	31.7358			GAPDH	10	24.7254
Ver	10	31.7851			GAPDH	10	24.4655
Ver	10	31.6589	31.7266		GAPDH	10	24.484	24.5583
Ver	100	31.1975			GAPDH	100	23.8431
Ver	100	31.0551			GAPDH	100	23.819
Ver	100	31.1017	31.1181		GAPDH	100	23.8236	23.8286
Ver	300	30.745			GAPDH	300	24.0811
Ver	300	30.8567			GAPDH	300	24.0895
Ver	300	30.9787	30.8601		GAPDH	300	24.0499	24.0735
n6											Summary
GOI	CPX conc.	Ct	mean Ct		HK Gene	CPX conc.	Ct	mean Ct			Gene of Interest (GOI)	Sample	Ct (GOI)	Ct GAPDH (REF)	∆Ct	∆∆Ct	fold
Ver	Control	30.0358			GAPDH	Control	30.1434				n6 VER	Control (0)	29.9164	29.9285	-0.0121141	0	1
Ver	Control	29.9119			GAPDH	Control	29.7615				n6 VER	1um Cipro	29.6069	28.7029	0.903977	0.916091	0.529943
Ver	Control	29.8016	29.9164		GAPDH	Control	29.8806	29.9285			n6 VER	10um Cipro	29.6759	30.7452	-1.06922	-1.0571	2.08075
Ver	1	29.499			GAPDH	1	28.9106				n6 VER	100um Cipro	31.7316	31.4704	0.261178	0.273292	0.827429
Ver	1	29.6771			GAPDH	1	28.5569				n6 VER	300um Cipro	33.1807	32.5539	0.626729	0.638843	0.642228
Ver	1	29.6447	29.6069		GAPDH	1	28.6413	28.7029
Ver	10	29.822			GAPDH	10	30.6931
Ver	10	29.5593			GAPDH	10	30.7017
Ver	10	29.6465	29.6759		GAPDH	10	30.8406	30.7452
Ver	100	31.75			GAPDH	100	31.616
Ver	100	31.5532			GAPDH	100	31.388
Ver	100	31.8915	31.7316		GAPDH	100	31.4071	31.4704
Ver	300	33.0174			GAPDH	300	32.5084
Ver	300	33.2929			GAPDH	300	32.6233
Ver	300	33.2317	33.1807		GAPDH	300	32.5301	32.5539

[truncated: 5 more sheets: Decorin PCR Recovery, Biglycan PCR Recovery, Fibromodulin PCR Recovery, Aggrecan PCR Recovery , Versican PCR Recovery]
